# Supplementary material
Source: PubMed Central journal article supplement (PMC4851170)
Supplement: NIHMS738076-supplement-307399R2_Acknowledgement_Permission_1.pdf [file NIHMS738076-supplement-307399R2_Acknowledgement_Permission_1.pdf]

Tom DeCoursey <tdecours@rush.edu>

Reply all

To:

Ariel Escobar;

Fri 8/28/2015 1:09 PM

Inbox

Dear Dr. Escobar,

I enjoyed reading your manuscript, "Intact Heart Loose Patch Photolysis Reveals Ionic Current Kinetics During Ventricular Action Potentials." This is clearly a strong work that advances the field with a very useful new technical approach.

I hope my comments and suggestions were helpful. I appreciate your offer to acknowledge my help in the *Acknowledgments Section of Circulation Research*.

Thomas E. DeCoursey, Ph.D.

Professor, Department of Molecular Biophysics and Physiology

Rush University Medical Center

[1750 West Harrison Street](#)

[Room 1245 Jelke Bldg.](#)

[Chicago, IL 60612-3824](#)

Phone (312) 942-3267

FAX (Dept.): (312) 942-8711

FAX (Lab): (312) 942-2118

emb: tdecours@rush.edu

url: <http://www2.phys.rush.edu/TomD/physiotd.html>
