# Supplementary material
Source: PubMed Central journal article supplement (PMC4851170)
Supplement: NIHMS738076-supplement-307399R2_Acknowledgement_Permission_2.pdf [file NIHMS738076-supplement-307399R2_Acknowledgement_Permission_2.pdf]

Michael Fill <Michael\_Fill@rush.edu>

Reply all|

To:

Josefina Ramos-Franco <Josefina\_Ramos-Franco@rush.edu>;

Ariel Escobar;

...

Fri 8/28/2015 12:48 PM

Inbox

I agree. You have my permission. Good luck with the paper. Bye  
Mike
