# Supplementary material
Source: PubMed Central journal article supplement (PMC4851170)
Supplement: NIHMS738076-supplement-307399R2_Acknowledgement_Permission_3.pdf [file NIHMS738076-supplement-307399R2_Acknowledgement_Permission_3.pdf]

Julio Copello <juliocopello@yahoo.com>

Reply all

To:

Ariel Escobar;

Fri 8/28/2015 2:40 PM

Inbox

Dear Ariel:

I accept to be acknowledged for my revision/comments of the first version of the manuscript entitled "Intact Heart Loose Patch Photolysis Reveals Ionic Current Kinetics During Ventricular Action Potentials".

Best regards

Julio Copello
