# Supplementary material
Source: PubMed Central journal article supplement (PMC4851170)
Supplement: NIHMS738076-supplement-307399R2_Acknowledgement_Permission_4.pdf [file NIHMS738076-supplement-307399R2_Acknowledgement_Permission_4.pdf]

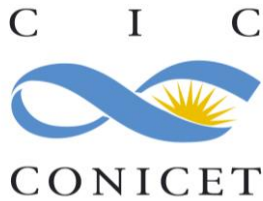

U N L P • CENTRO DE INVESTIGACIONES

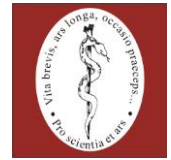

## CARDIOVASCULARES

La Plata, August 29, 2015

Dr. Ariel L. Escobar  
Biological Engineering and  
Small Scale Technologies,  
School of Engineering,  
University of California,  
Merced, California

Dear Dr. Escobar

I agree that you acknowledge the comments I made on your manuscript entitled "Intact Heart Loose Patch Photolysis Reveals Ionic Current Kinetics During Ventricular Action Potentials".

Sincerely yours,

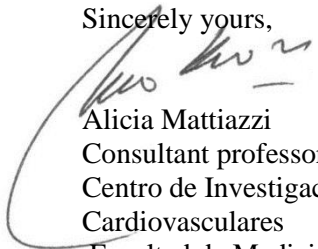

Alicia Mattiazi  
Consultant professor  
Centro de Investigaciones  
Cardiovasculares  
Facultad de Medicina  
La Plata  
Argentina
